# Supplementary material
Source: publisher site journal article supplement (https://www.dovepress.com/article/427775)
Supplement: Supplementary file 1 [file get_supplementary_file.php]

**Supplementary Material 1: Dermatologists Questionnaire**

| **Questionnaire Number** | |  |
| --- | --- | --- |
| **Interviewer Name** | **Date of interview** | **Supervisor name** |
|  |  |  |

| **Back Checked By:** | **Date of Back Check:** | **Result of Back Check**  **(OK, Query, Reject)** |
| --- | --- | --- |
|  |  |  |

| **RESPONDENT DETAILS** | |
| --- | --- |
| **Physician name** |  |
| **Hospital/Clinic name** |  |
| **Telephone number** |  |

**Screener – Dermatologists**

| **IMPORTANT CRITERIA** |
| --- |
| **PRIORITY CRITERIA FOR ALL RESPONDENTS:**   1. Primary medical specialty of dermatology 2. Treats >10 Psoriasis patients 3. Able and willing to complete questionnaires 4. Able and willing to help collection of data from patients |

**INTRODUCTION & SCOPE**

Good morning/afternoon/evening. My name is _____________________, I work for IQVIA who are currently conducting an important market research. The research is being sponsored by a pharmaceutical company. The research is being conducted with physicians in the area of Psoriatic Arthritis.

First, I would like to check that you are eligible to take part in this study; may I ask you a few quick questions?

| **S1 [ALL] Could you please tell me your primary specialty?** | | |
| --- | --- | --- |
| **Dermatology** | **1** | **CONTINUE TO S2** |
| **Other** | **2** | **CLOSE** |

| **S2 [ALL] Where do you spend majority of your practice time? Please select one response only.** | |
| --- | --- |
| **Public hospital (MOH/ Institutional)** | **1** |
| **Privately funded hospital/ Office based clinic** | **2** |

| **S3 [ALL] Approximately, how many patients with Psoriasis are you actively managing? Please consider unique patients, not patient visits.** | |
| --- | --- |
| **# Psoriasis patients………** | **CLOSE IF <10 Patients** |

| **S4 [ALL] During the course of our study we are aiming to collect information from Psoriasis patients about their disease experience, would you be willing to help us identify and collect the needful information from the patients for the purpose of market research?** | | |
| --- | --- | --- |
| **Yes** | **1** | **CONTINUE** |
| **No** | **2** | **CLOSE** |

Thank you for your interest in our study, we are inviting physicians like yourself to take part in our study. This is purely a market research exercise to help us understand more about your views and opinions. No one will attempt to sell you anything either during the interview or afterwards. We would very much appreciate your opinions.

The research will take up to 30 minutes in total. We are offering an honorarium of (insert as appropriate) to those who take part.

Would you be interested in participating in this discussion?

Yes 1 RECRUIT

No 2 CLOSE

PERSONAL DATA: Please be informed that we limit the personal data we hold about you to contact details and information about your work place and specialization in order to conduct our studies.

Your responses and any personal contact information you provide in completing the survey will be:

- Processed by the IQVIA Incorporated group of companies (“IQVIA”) on a strictly need-to-know basis, for purposes of informing IQVIA and its clients of current and on-going trends in the management of Psoriasis and for any follow-up contact that you have consented to.
- Disclosed to the sponsoring pharmaceutical company, meaning that the answers are linked to your identity, for use by the sponsoring pharmaceutical company to define its marketing strategy and orientate communications with healthcare professionals.
- Passed on to the sponsoring pharmaceutical company in the event of adverse event reporting**
- Stored securely on IQVIA servers located in the EU, US, and other countries where necessary, in accordance with applicable data protection laws and retained only as long as necessary for the purposes of use outlined herein.

**ADVERSE EVENTS REPORTING: We are now being asked to pass on to our client, details of adverse events that are mentioned during the course of market research. Should you raise, during the survey, an adverse event in a specific patient or in a specific number of patients, we will need to report this even if it has already been reported by you directly to the company or the regulatory authorities. Due to the nature of this study being at a named level, should you agree to proceed with this survey, your contact details, along with the adverse event, will be passed on to the drug safety department of the company.

CONFIDENTIALITY AGREEMENT: You acknowledge that in the course of this study, proprietary information regarding products and product development, and other trade secrets and know-how may be disclosed, and by participating in this study you agree to hold all such information confidential and to not disclose it to any third party or use it for any other purpose whatsoever. You also agree not to disclose any part of the following pages, which are proprietary material of IQVIA and its clients. You are required to accept the above confidentiality agreement in order to participate in this survey.

*I confirm my agreement to proceed with this research and to the processing of my personal information provided to IQVIA, as stated above.*

Accept our conditions and start now 1

Cancel 2

**MAIN QUESTIONNAIRE**

1. **Approximately how many patients do you treat during a typical month regardless their condition?**

.................... # patients seen

1. **Approximately how many patients do you see for the treatment of psoriasis during a typical month?**

.................... # Psoriasis patients seen

1. **Based on your knowledge and experience, what percentage of all psoriasis patients in KSA do you believe are still undiagnosed?**

………………………% Don’t know ❑

1. **In your opinion, what are some of the key reasons why some people remain undiagnosed despite having a suspected psoriasis condition?**

| **Reason** | **Multiple Choice** |
| --- | --- |
| - Lack of awareness among patients | **❑** |
| - Lack / Low awareness among primary care physicians | **❑** |
| - Lack / Low awareness among specialists | **❑** |
| - Lack of access to specialty medicine (2ry / 3ry care) | **❑** |
| - No screening programs | **❑** |
| Other, specify | **❑** |

1. **In your opinion, what percentage of suspected psoriasis patients are referred to a dermatologist?**

………………………% of psoriasis patients are referred to a dermatologist

1. **What is the average time lapse between beginning of psoriasis symptoms and confirming the diagnosis of psoriasis?**

| **Months** | **Years** |
| --- | --- |
|  |  |

1. **What is the average timeframe between patients’ first pre-diagnosis visits to their referring doctors and their first visit to you (months)?**

| **Months** |
| --- |
|  |

1. **What is usually initial reaction of patients to diagnosis?**

| **Reaction** | **Single Choice** |
| --- | --- |
| - Okay | **❑** |
| - Worried / afraid | **❑** |
| - Sad | **❑** |
| - Frustrated / depressed | **❑** |
| - Denial | **❑** |
| - Shocked | **❑** |

1. **Thinking about psoriasis patients’ life overall, how much does their disease impact upon each of the following aspects?**

**Please use a 10-point scale where “1” means very minor impact, and “10” means very high impact**

| ***Impact that Psoriasis has upon patients’….*** | ***Impact (1-10)*** |
| --- | --- |
| Everyday activity |  |
| Work life |  |
| Social life |  |
| Family life |  |
| Intimacy and relationship with partner |  |

1. **Thinking of your psoriasis patients can you rate level of symptoms that were most disturbing?**

**Use a 10-point scale where “1” means not at all disturbing, and “10” means extremely disturbing**

| ***Symptoms*** | ***Rating (1-10)*** |
| --- | --- |
| Skin appearance |  |
| Itchiness / pruritus |  |
| Cracked dry skin |  |
| Skin bleeding |  |
| Burning sensation |  |
| Fatigue |  |
| Depression |  |
| Sleep disturbance |  |

1. **Are you using screening tool (questionnaire) in your clinic? if yes, which one?**

| - No ❑ |  | |
| --- | --- | --- |
| - Yes ❑ | PEST | ❑ |
| PASE | ❑ |
| EARP | ❑ |
| ToPAS | ❑ |

1. **Do you always set specific treatment goals / desired outcomes with your patient before initiation of treatment?**

| - Yes | ❑ |
| --- | --- |
| - No | ❑ |

1. **When treatment goals / desired outcomes were set, how much influence did you have in setting these compared to your patient?**

| I had no input and the goals were solely set by my patient | ❑ |
| --- | --- |
| I had some input, but the goals were mainly set by my patient | ❑ |
| My patient and I had equal input | ❑ |
| I had strong input and the goals were mainly set by me | ❑ |
| I had full input and the goals were solely set by me | ❑ |

1. **How regularly do your patients visit you to review treatment success?**

| Weekly | ❑ |
| --- | --- |
| Monthly | ❑ |
| Every 2-3 months | ❑ |
| Every 6 months | ❑ |
| Yearly | ❑ |
| Less often than every 12 months | ❑ |

1. **How much time do you allocate to your patient during your regular visits?**

| Less than 10 minutes | ❑ |
| --- | --- |
| 10-20 minutes | ❑ |
| 20-30 minutes | ❑ |
| >30 minutes | ❑ |

1. **Which aspects of disease that you would you like to improve further for your patient if you had more time and resources?**

| Impact upon patient’s work life | ❑ |
| --- | --- |
| Impact upon patient’s social life | ❑ |
| Impact upon patient’s family | ❑ |
| Impact upon how my patients feel / their mental/psychological wellbeing | ❑ |
| Other (please specify):  _______________________________________ | ❑ |

1. **What do you feel is missing / needed to improve overall success of disease management in your practice?**

|  | **Multiple select** |
| --- | --- |
| Treatment efficacy in controlling disease symptoms | 1 |
| Treatment efficacy in preventing / reducing disease progression | 2 |
| Treatment safety / tolerability | 3 |
| Patients convenience (treatments route of administration, frequency) | 4 |
| Patients’ compliance / adherence | 5 |
| Patients’ Quality of Life whilst on treatment | 6 |
| Other, specify | 7 |

1. **Thinking specifically about systemic treatments for moderate and severe Psoriasis patients, which of the following strategies best describes your common approach?**

|  | **Single select** |
| --- | --- |
| Start with one DMARD (e.g. MTX or Leflunomide), then switch to biologic treatments if there is no adequate response to the DMARD | 1 |
| Try 2 different DMARDs before switching to biologic treatments | 2 |
| Start directly with biologic treatments | 3 |
| Other, specify | 4 |

1. **When starting biologic treatments, which one/s you prescribe the most as 1st biologic, and which one/s prescribe the most as 2nd biologic (you can choose maximum 2 drugs per each column)**

| **Treatment** | **1st biologic** | **2nd biologic** |
| --- | --- | --- |
| Adalimumab e.g., Humira | ❑ | ❑ |
| Etanercept e.g., Enbrel® | ❑ | ❑ |
| Infliximab e.g., Remicade® | ❑ | ❑ |
| Golimumab e.g., Simponi® | ❑ | ❑ |
| Certolizumab Pegol e.g., Cimzia® | ❑ | ❑ |
| Ustekinumab e.g., Stelara® | ❑ | ❑ |
| Secukinumab e.g., Cosentyx® | ❑ | ❑ |
| Ixekizumab e.g., Taltz® | ❑ | ❑ |
| Guselkumab e.g., Tremfya® | ❑ | ❑ |
| Risankizumab e.g., Skyrizi® | ❑ | ❑ |
| Tildrakizumab e.g., Ilumya® | ❑ | ❑ |
| Apremilast e.g., Otezla® | ❑ | ❑ |
| Tofacitinib e.g., Xeljanz® | ❑ | ❑ |

1. **What are the most common signs, symptoms that you look for in a patient that prompts you to initiate or refer to a rheumatologist for diagnosis of Psoriatic Arthritis? Spontaneous**

|  | **Multiple select** |
| --- | --- |
| Presence of psoriasis | 1 |
| Swelling, tenderness and inflammation of the joints | 2 |
| Morning stiffness or stiffness after resting | 3 |
| Nail changes | 4 |
| Swelling of fingers or toes | 5 |
| Asymmetric joint symptoms | 6 |
| Enthesitis (pain and swelling of the entheses or places where tendons and ligaments connect to bone) | 7 |
| Inflammatory-type back pain that is worse with rest and better with activity | 8 |
| Fatigue | 9 |
| Redness and swelling in the eye | 10 |
| Others, specify__________________ | 11 |

1. **Do you have a practice of combined clinic with rheumatologists in your hospital?**

| - Yes | ❑ |
| --- | --- |
| - No | ❑ |

1. **Which of the below HCPs in your hospital you closely interact with for PsA management and how satisfied are you with this engagement? (using a 10-point scale)**

|  | **You interact with for PsA management** | **Satisfaction (1-10)** |
| --- | --- | --- |
| Rheumatologist | ❑ |  |
| Psychologist | ❑ |  |
| GP / Family Physician | ❑ |  |
| Pain Specialist | ❑ |  |
| Internal Medicine | ❑ |  |
| Nurse | ❑ |  |
| Other type of healthcare provider (Which one/s)………………………….. | ❑ |  |

1. **Do you train your psoriasis patients on the risk of disease progression and all possible signs and symptoms of psoriatic arthritis?**

| - Yes | ❑ |
| --- | --- |
| - No | ❑ |

1. **How frequently you question your patients on non-skin symptoms which may lead to psoriatic arthritis diagnosis?**

| **Monthly** | **❑** |
| --- | --- |
| Every 2-3 months | ❑ |
| Every 6 months | ❑ |
| Yearly | ❑ |
| Less often than every 12 months | ❑ |
| Never / hardly ever | ❑ |

1. **Which symptoms should be questioned proactively for non-skin related symptoms in your opinion?**

| Joint Pain | ❑ |
| --- | --- |
| Joint Swelling | ❑ |
| Swollen finger or toe | ❑ |
| Morning stiffness | ❑ |
| Fatigue | ❑ |
| Depression | ❑ |
| Sleep disturbance | ❑ |
| Eye redness or pain | ❑ |

1. **Do you refer all suspected PsA patients to rheumatology department in your hospital?**

| - Yes | ❑ |
| --- | --- |
| - No | ❑ |

1. **What percentage of your patients who progressed to PsA, are already receiving biologic treatments?**

………………………… %

**Supplementary Material 2: Psoriasis Patients Questionnaire**

| **Questionnaire Number** | | |
| --- | --- | --- |
| **Interviewer Name** | **Date of Interview** | **Supervisor Name** |
|  |  |  |

| **Back Checked By:** | **Date of Back Check:** | **Result of Back Check**  **(OK, Query, Reject)** |
| --- | --- | --- |
|  |  |  |

| **RESPONDENT DETAILS** | |
| --- | --- |
| Name |  |
| Gender | Male ❑ Female ❑ |
| Contact number (Optional) |  |
| Record Region/city **(KSA)** |  |

| INCLUSION CRITERIA |
| --- |
| **PRIORITY CRITERIA FOR ALL RESPONDENTS:**   1. Confirmed Psoriasis diagnosis by dermatologist 2. Aged ≥18 years 3. Able to read, speak, and understand Arabic or English 4. Able and willing to complete questionnaires |

**Screener Questions**

S1. Record nationality: **SINGLE CODE ONLY**

| Saudi | 1 |
| --- | --- |
| Expat Arab | 2 |
| Eastern Asian | 3 |
| South East Asian | 4 |
| Westerner | 5 |

S2. Record age in completed years: …………**YEARS**

S3. What is your height in Cm? ________cm

S4. What is your weight in Kg? ________kg

S5. Record Highest level of education

| **Education status** | **Single select** |
| --- | --- |
| Elementary school | ❑ |
| High school | ❑ |
| College degree | ❑ |
| Post Graduate degree | ❑ |

S6. Record Current living/domestic situation

| Living alone | ❑ |
| --- | --- |
| Living with a spouse / family | ❑ |

S7. Record Employment Status

| **Employment status** | **Single select** |
| --- | --- |
| Working full time | ❑ |
| Working part time | ❑ |
| Self-employed | ❑ |
| A homemaker | ❑ |
| Retired | ❑ |
| Unable to work | ❑ |

S8. Smoking History

| **Smoking status** | **Single select** |
| --- | --- |
| Current smoker | ❑ |
| Past smoker | ❑ |
| Never smoked | ❑ |

| **MAIN QUESTIONNAIRE** |
| --- |

IQVIA, a global healthcare insights and market research company, is seeking your input in developing an in-depth understanding of patients’ disease experience.

We are conducting this survey on behalf of a pharmaceutical company. Any information presented during the course of this research is done solely to explore reactions to such information and should be assumed to represent hypotheses about what can be said about a product or disease area.  It will not be used to influence decisions outside the research setting.

Please be assured that this survey is strictly for marketing research purposes and is being carried out within the defined Market Research code of conduct for your country. The information you provide will be treated as confidential and your identity will not be revealed to a third party without your prior consent. The survey will take approximately **15 minutes** to complete. Based on this information, are you willing to proceed with the survey?

| Yes | CONTINUE |
| --- | --- |
| No | TERMINATE |

| **ADVERSE EVENTS** |
| --- |

Interviewer say:

*“We are required by law to pass on to our client details of any side effects or product technical complaints related to their own products that are mentioned during the course of market research.*

*Although what you say will, of course, be treated in confidence, should you mention during the discussion a side effect or product technical complaint when you, or someone you know, became ill after taking one of our client’s products, or a problem you have had with one of our client’s products we will need to report this, so that they can learn more about the safety of their products.*

*Are you happy to proceed with the interview on this basis?”*

| Yes | CONTINUE |
| --- | --- |
| No | TERMINATE |

*In case you mention an adverse event during this research, we would file a report without giving any of your details, but if the Drug Safety Department requires more information, would you be willing to waive the confidentiality given to you under the Codes of conduct specifically in relation to that adverse event, so they can contact you directly for further information?*

*Please note that if you provide your name during the Adverse Event reporting, this will not be linked in any way to the responses given during the program and everything else you say during the course of the interview will continue to remain confidential.*

| Yes | CONTINUE |
| --- | --- |
| No | CONTINUE |

1. Which of the following conditions, if any, are you currently treated for?

| **Condition** | **Multiple select** |
| --- | --- |
| Asthma | ❑ |
| Heart Disease or other cardiovascular condition | ❑ |
| Osteoporosis | ❑ |
| Systemic Lupus Erythematosus (SLE) | ❑ |
| Multiple Sclerosis | ❑ |
| Crohn’s Disease | ❑ |
| Ulcerative Colitis | ❑ |
| Bipolar / schizophrenia | ❑ |
| High blood pressure | ❑ |
| Diabetes | ❑ |
| Thyroid disease | ❑ |
| Depression | ❑ |
| I am not currently treated for any of these conditions | ❑ |

1. Please tell us the year and month in which you had first psoriasis symptoms?

| **Year** | **Month** |
| --- | --- |
|  |  |

1. Please tell us the year and month in which you were officially diagnosed with psoriasis?

| **Year** | **Month** |
| --- | --- |
|  |  |

1. Since the time you had your first symptoms, how long did it take for you to talk with your first physician regarding your psoriasis symptoms?

|  | **Single Select** |
| --- | --- |
| Within a month | ❑ |
| Within 2-6 months | ❑ |
| Within 6-12 months | ❑ |
| Longer | ❑ |

1. And then, how long did it take for your doctor refer you to a dermatologist (if first presented to other specialty)?

|  | **Single Select** |
| --- | --- |
| Same day as he/she learned my new symptoms | ❑ |
| Within a week | ❑ |
| Within 2-3 weeks | ❑ |
| Within a month | ❑ |
| Within 2-3 months | ❑ |
| Within 4-6 months | ❑ |
| Longer | ❑ |
| **I first presented to a dermatologist** | ❑ |

1. Thinking about when you were first diagnosed with psoriasis how long was it before you were started on your first treatment?

|  | **Single Select** |
| --- | --- |
| Same day as diagnosis | ❑ |
| Within a week | ❑ |
| Within 2-3 weeks | ❑ |
| Within a month | ❑ |
| Within 2-3 months | ❑ |
| Within 4-6 months | ❑ |
| Within 7-12 months | ❑ |
| Within 1-2 years | ❑ |
| Longer | ❑ |

1. What was your initial reaction& how did you accepted the fact of being Psoriasis patient?

| **Reaction** | **Single Select** |
| --- | --- |
| Okay | ❑ |
| Worried / afraid | ❑ |
| Sad | ❑ |
| Frustrated / depressed | ❑ |
| Denial | ❑ |
| Shocked | ❑ |

1. Thinking about your life overall, how much does your disease impact upon each of the following?

Please use a 10-point scale where “1” means very minor impact, and “10” means very high impact

| ***Impact that Psoriatic Arthritis has upon your….*** | ***Impact (1-10)*** |
| --- | --- |
| Everyday life |  |
| Work life |  |
| Social life |  |
| Family life |  |
| Intimacy with partner |  |
| Relationship with partner |  |

1. Thinking about when you started your current treatment was a plan with specific treatment goals / desired outcomes set with your physician?

| - Yes | ❑ |
| --- | --- |
| - No | ❑ |

1. Rate level of your symptoms that was most disturbing for you before you started treatment.

Use a 10-point scale where “1” means not at all disturbing, and “10” means extremely disturbing

|  | ***Rate (1-10)*** |
| --- | --- |
| Skin appearance |  |
| Itchiness |  |
| Cracked dry skin |  |
| Skin Bleeding |  |
| Burning sensation |  |
| Fatigue |  |
| Depression |  |
| Sleep disturbance |  |
| Eye redness or pain |  |

1. What treatment goals / desired outcomes were set when you started your current treatment?

|  | **Multiple select** |
| --- | --- |
| Reducing or alleviating my skin-related symptoms | ❑ |
| Improving my overall, everyday quality of life | ❑ |
| Improving my ability to socialize/interact with friends and family | ❑ |
| Allowing me to engage in exercise/fitness activities/sports | ❑ |
| Allowing me to carry out usual, daily tasks | ❑ |
| Improving my ability to perform at work | ❑ |
| Improving my disease sufficiently to allow me to have a job | ❑ |
| Allowing me to work full-time | ❑ |
| Allowing me to pursue my desired career | ❑ |
| Minimizing the pain I experience due to my disease | ❑ |
| Minimizing the fatigue I experience from my disease | ❑ |
| Improving my physical functioning and mobility | ❑ |
| Slowing the progression of my disease | ❑ |
| Allowing me to get pregnant / have children (Female respondents) | ❑ |
| Improving my mental well-being | ❑ |

1. When your treatment goals / desired outcomes were set, how much influence did you have in setting these compared to your physician?

|  | **Single Select** |
| --- | --- |
| I had **no input** and the goals were solely **set by my physician** | ❑ |
| I had **some input** but the goals were **mainly set by my physician** | ❑ |
| My physician and I had **equal input** | ❑ |
| I had **strong input** and the goals were **mainly set by me** | ❑ |
| I had **full input** and the goals were **solely set by me** | ❑ |

1. How regularly do you visit your physician to review your treatment success?

| Weekly or more | ❑ |
| --- | --- |
| 2-3 times a month | ❑ |
| Monthly | ❑ |
| Every 2-3 months | ❑ |
| Every 6 months | ❑ |
| Yearly | ❑ |
| Less often than every 12 months | ❑ |

1. How much time does your doctor allocate to you during your regular visits?

| Less than 10 minutes | ❑ |
| --- | --- |
| 10-20 minutes | ❑ |
| 20-30 minutes | ❑ |
| >30 minutes | ❑ |

1. How comfortable are you in discussing the treatment(s) that work best for you with your physician?

Use a 10-point scale where “1” means not at all comfortable, and “10” means extremely comfortable

………………….. Rate (1-10)

1. Do you seek additional information other than your doctor provides?

| - Yes | ❑ |
| --- | --- |
| - No | ❑ |

1. What sources do you use to get to know more about your disease and the treatments you use for Psoriasis?

|  | **Multiple select** |
| --- | --- |
| Doctors | ❑ |
| Pharmacists | ❑ |
| Family / friends | ❑ |
| Patient advocacy groups | ❑ |
| Internet websites / search engines | ❑ |
| Social media | ❑ |
| Product information leaflets | ❑ |
| Pharmaceutical company website | ❑ |
| Other, specify ……………. | ❑ |

1. What kind information are you interested in / searching for?

|  | **Multiple select** |
| --- | --- |
| Disease related information | ❑ |
| Treatment related information | ❑ |
| Lifestyle and dietary habits advices | ❑ |
| Home remedies | ❑ |
| Other people’s experience with the disease | ❑ |
| Experts’ opinion | ❑ |
| Other, specify …………… | ❑ |

1. Thinking about when you and your physician discussed your current treatment, how satisfied or dissatisfied were you with the following aspects?

Please use a 10-point scale where “1” means not at all satisfied, and “10” means completely satisfied

|  | ***Satisfaction (1-10)*** |
| --- | --- |
| The amount of **available time for discussing treatment options** with your physician |  |
| The **number of treatment options** your physician discussed with you |  |
| Your **level of involvement in choosing** your current treatment |  |
| **Overall interaction** with your physician |  |
| Overall **education / training** received |  |

1. Which aspects of your disease that you would you like to discuss further with your physician?

|  | **Multiple select** |
| --- | --- |
| Impact upon my work life | ❑ |
| Impact upon my social life | ❑ |
| Impact upon my family life | ❑ |
| Impact upon how I feel / my mental/psychological wellbeing | ❑ |
| Treatment convenience | ❑ |
| Treatment tolerability | ❑ |
| Treatment safety | ❑ |
| Treatment goals / desired outcomes | ❑ |
| Other (please specify): ____________________________________ | ❑ |

1. What treatment / treatments are you currently using?

| **Treatment** | **Multiple select** |
| --- | --- |
| **Biologics & Targeted Systemic Therapies** | |
| Adalimumab e.g., Humira | ❑ |
| Etanercept e.g., Enbrel® | ❑ |
| Infliximab e.g., Remicade®, Remsima® | ❑ |
| Golimumab e.g., Simponi® | ❑ |
| Certolizumab Pegol e.g., Cimzia® | ❑ |
| Ustekinumab e.g., Stelara® | ❑ |
| Secukinumab e.g., Cosentyx® | ❑ |
| Ixekizumab e.g., Taltz® | ❑ |
| Guselkumab e.g., Tremfya® | ❑ |
| Risankizumab e.g., Skyrizi® | ❑ |
| Tildrakizumab e.g., Ilumya® | ❑ |
| Apremilast e.g., Otezla® | ❑ |
| Tofacitinib e.g., Xeljanz® | ❑ |
| **Topical treatment** | |
| Ointment/cream/gel/foam/spray | ❑ |
| **Phototherapy** | |
| UVA1 / PUVA / NB-UVB | ❑ |
| **Conventional Systemic Therapy** | |
| Cyclosporine | ❑ |
| Sulphasalazine | ❑ |
| Methotrexate (MTX) | ❑ |
| Cortisone (corticosteroids) | ❑ |
| Leflunomide | ❑ |
| Hydroxychloroquine | ❑ |

1. How do you describe your compliance with the specific dose and timing of your medication?

|  | **Single Select** |
| --- | --- |
| May miss many doses per year (>5 doses) | ❑ |
| May miss few doses per year (3 to 5 doses) | ❑ |
| Rarely miss any doses (1 to 3 doses per year) | ❑ |
| Never miss any dose | ❑ |

1. Why you may miss some doses of your treatment?

| **Treatment** | **Multiple select** |
| --- | --- |
| Don’t understand the directions correctly | ❑ |
| Misunderstand the treatment regimen | ❑ |
| Forgetfulness | ❑ |
| I feel I don’t need the treatment | ❑ |
| I have other commitments conflicting with the treatment time | ❑ |
| Complex treatment regimen | ❑ |
| Psychological factor | ❑ |
| If others specify………… | ❑ |

1. To what extent have your initial expectations for the treatment been matched by the results achieved?

Using a 10-point scale where “1” means not at all matched, and “10” means completely matched

|  | **Rate (1-10)** |
| --- | --- |
| Reducing or alleviating my skin-related symptoms |  |
| Reducing or alleviating my joint-related symptoms |  |
| Improving my overall, everyday quality of life |  |
| Improving my ability to socialize/interact with friends and family |  |
| Allowing me to engage in exercise/fitness activities/sports |  |
| Allowing me to carry out usual, daily tasks |  |
| Improving my ability to perform at work |  |
| Improving my disease sufficiently to allow me to have a job |  |
| Allowing me to work full-time |  |
| Allowing me to pursue my desired career |  |
| Minimizing the pain I experience due to my disease |  |
| Minimizing the fatigue I experience from my disease |  |
| Improving my physical functioning and mobility |  |
| Slowing the progression of my disease |  |
| Allowing me to get pregnant / have children (Female respondents) |  |
| Improving my mental well-being |  |

1. Overall, how satisfied are you with the current treatment?

Please use a 10-point scale where “1” means not at all satisfied, and “10” means completely satisfied

……………….. Satisfaction (1-10)

1. Do you have pain or swelling in your joints?

| - Yes | ❑ |
| --- | --- |
| - No | ❑ |

1. If yes did you inform your physician on this?

| - Yes | ❑ |
| --- | --- |
| - No | ❑ |

1. If yes did your doctor refer you to a rheumatologist?

| - Yes | ❑ |
| --- | --- |
| - No | ❑ |

1. To your opinion which of the following symptoms can be seen in psoriasis patients?

|  | **Multiple select** |
| --- | --- |
| Fatigue | ❑ |
| Tenderness, pain and swelling over tendons | ❑ |
| Swollen fingers and toes that sometimes resemble sausages | ❑ |
| Stiffness, pain, throbbing, swelling and tenderness in joints | ❑ |
| A reduced range of motion | ❑ |
| Morning stiffness and tiredness | ❑ |
| Nail changes — for example, the nail separates from the nail bed or becomes pitted, mimicking fungus infections | ❑ |
| Redness and pain of the eye (uveitis) | ❑ |
